# Supplementary material for: Computational Modelling of Measles Transmission Dynamics Among Children Under 5 Years in Borno State, Nigeria: A Compartmental SVEIR Model
Source: Research Square preprint supplement (doi:10.21203/rs.3.rs-6946934/v1), 2025-07-14
Supplement: Supplementary file 1 [file 79c5ab8c4bc01ace764d3897.xlsx]

## Sheet: Measles_Data_2016_2023_Borno
Time(Month)	Jere	Konduga	Mafa	Maiduguri
0	12	2	1	10
1	7	3	2	27
2	1	0	0	3
3	17	2	1	1
4	50	1	0	17
5	2	5	0	200
6	8	7	0	106
7	166	16	0	120
8	131	16	0	104
9	59	35	0	87
10	39	9	2	30
11	9	9	0	13
12	0	1	0	3
13	4	0	0	2
14	0	2	0	2
15	1	0	0	0
16	1	0	0	2
17	0	0	0	2
18	0	3	0	0
19	0	0	0	1
20	1	0	0	0
21	0	3	0	1
22	2	0	0	0
23	6	0	0	8
24	0	3	0	5
25	2	4	0	5
26	2	0	0	1
27	1	1	0	0
28	2	3	0	6
29	3	0	0	1
30	0	1	0	1
31	0	0	0	1
32	2	2	0	2
33	0	0	0	17
34	11	1	0	11
35	244	34	31	833
36	343	99	17	1324
37	474	125	9	2976
38	658	111	0	1766
39	468	19	0	839
40	56	15	0	288
41	34	1	0	33
42	0	1	0	0
43	3	0	0	0
44	0	7	0	41
45	1	11	0	71
46	1	21	1	59
47	1	0	0	1
48	1	0	0	1
49	0	0	0	1
50	41	27	17	80
51	30	21	9	100
52	546	70	33	391
53	275	216	71	845
54	310	177	106	624
55	58	103	155	713
56	262	62	192	654
57	87	96	75	322
58	53	37	58	282
59	178	15	59	383
60	26	10	158	524
61	205	26	101	555
62	123	24	31	316
63	138	40	112	246
64	174	77	74	265
65	352	45	42	299
66	242	46	42	288
67	271	34	27	123
68	46	40	31	104
69	79	58	46	373
70	90	12	36	235
71	73	50	94	175
72	157	24	34	184
73	84	52	40	459
74	233	131	7	314
75	134	25	11	224
76	162	39	12	291
77	83	1	1	140
78	138	1	4	280
79	158	7	7	223
80	1	62	0	1
81	0	35	0	0
82	2	27	0	0
83	0	0	0	3
84	1	0	0	0
